# Supplementary material for: Transmission of Diverse Variants of Strawberry Viruses Is Governed by a Vector Species
Source: MDPI journal article supplement (doi:10.3390/v14071362), 2022-06-23
Supplement: s1 [file s1]

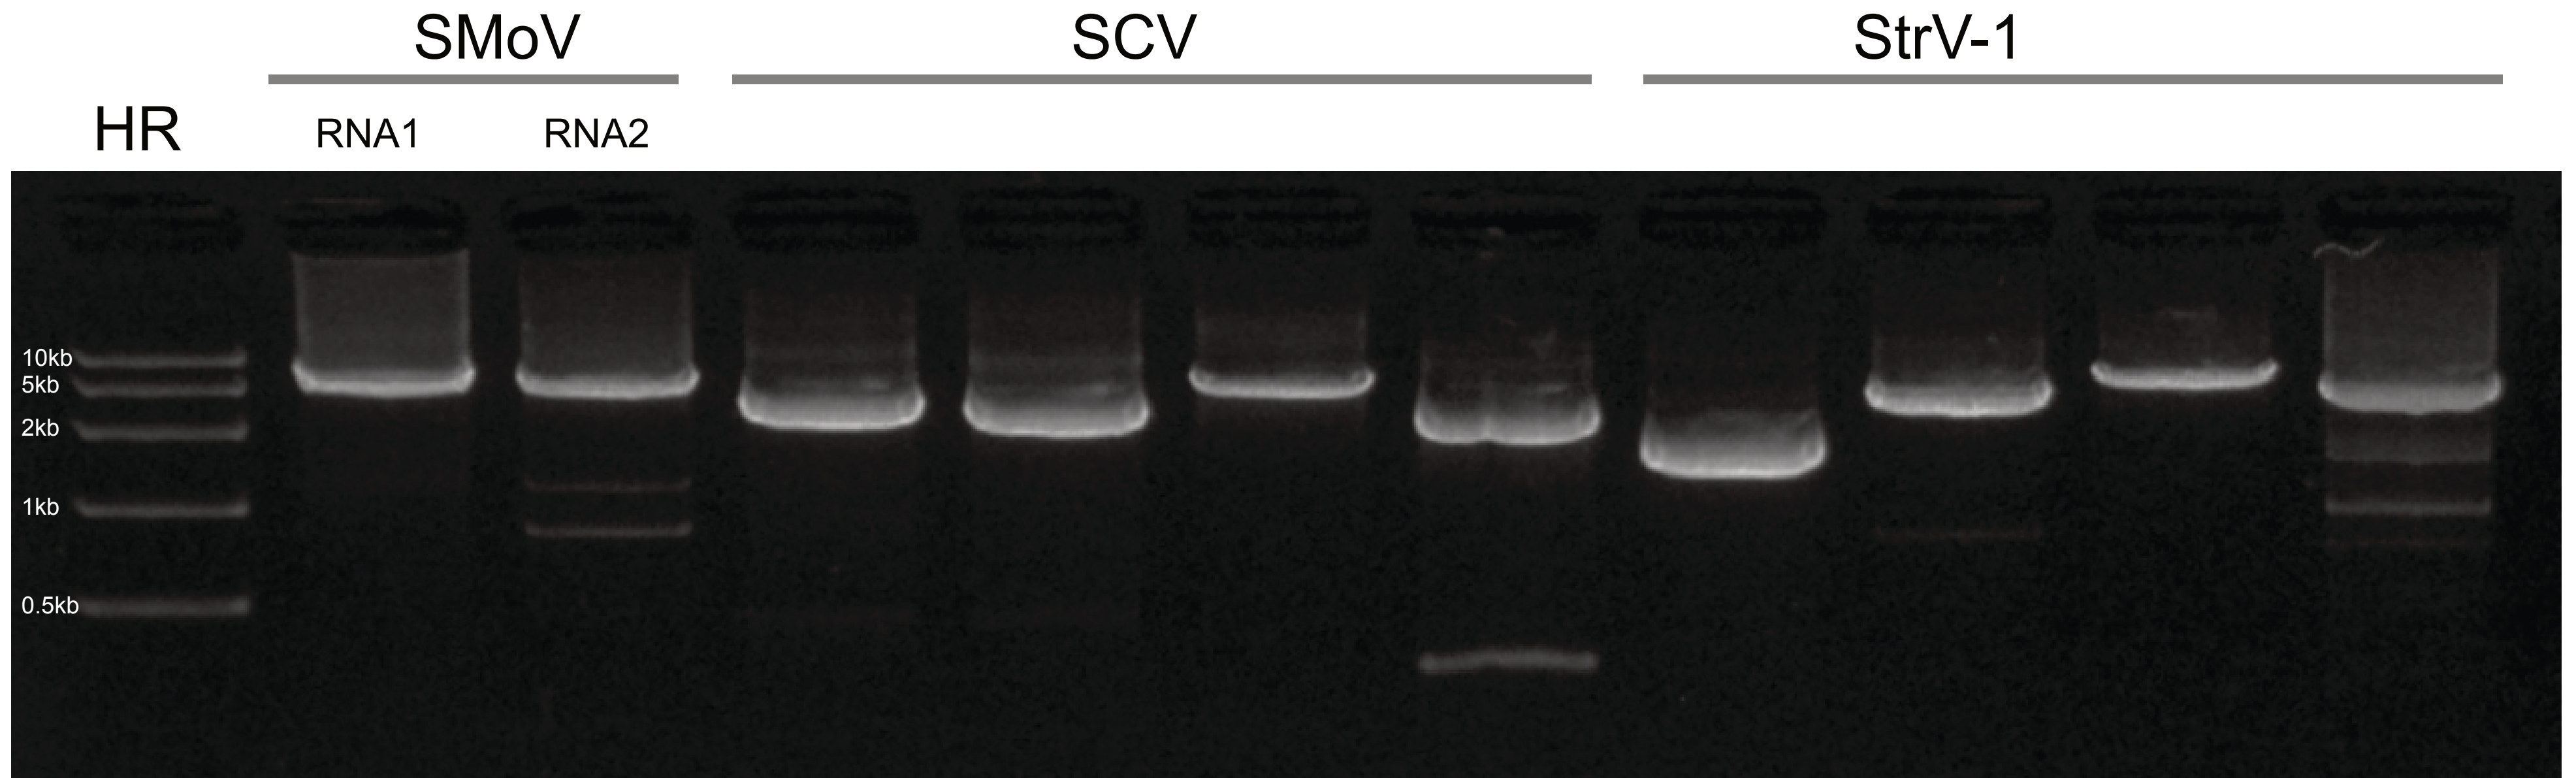

**Figure S2** Agarose gel electrophoresis of the amplified fragments of strawberry crinkle virus (SCV), strawberry mottle virus (SMoV) and strawberry virus 1 (StrV-1), HR - HighRange ladder (0.5 - 10 kb).
